# Supplementary material for: Abnormal lipid metabolism in epidermal Langerhans cells mediates psoriasis-like dermatitis
Source: PubMed Central journal article supplement (PMC9310522; doi:10.1172/jci.insight.150223), 2022-07-08
Supplement: jciinsight-7-150223-s140.pdf [file jciinsight-7-150223-s140.pdf]

## Supplementary Data

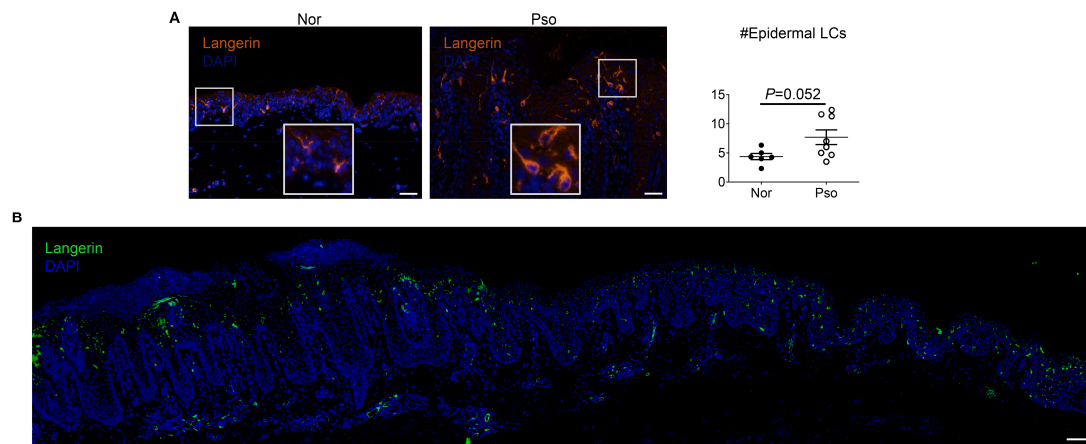

### Supplementary Figure 1 Epidermal LCs enlarge in psoriatic lesions

**(A)** Representative immunofluorescence of LCs (langerin<sup>+</sup>) and their numbers in FFPE tissue sections of normal human skin and psoriatic lesions (x 200; bar=50 $\mu$ m; n=14, three independent experiments).

**(B)** Immunofluorescence of epidermal LC distribution in a FFPE tissue section of the psoriatic lesion and adjacent unaffected skin tissue from one psoriasis patient (x 6; bar=100 $\mu$ m). Two-tailed Student's t-test was performed. The data are presented as mean  $\pm$  SEM.

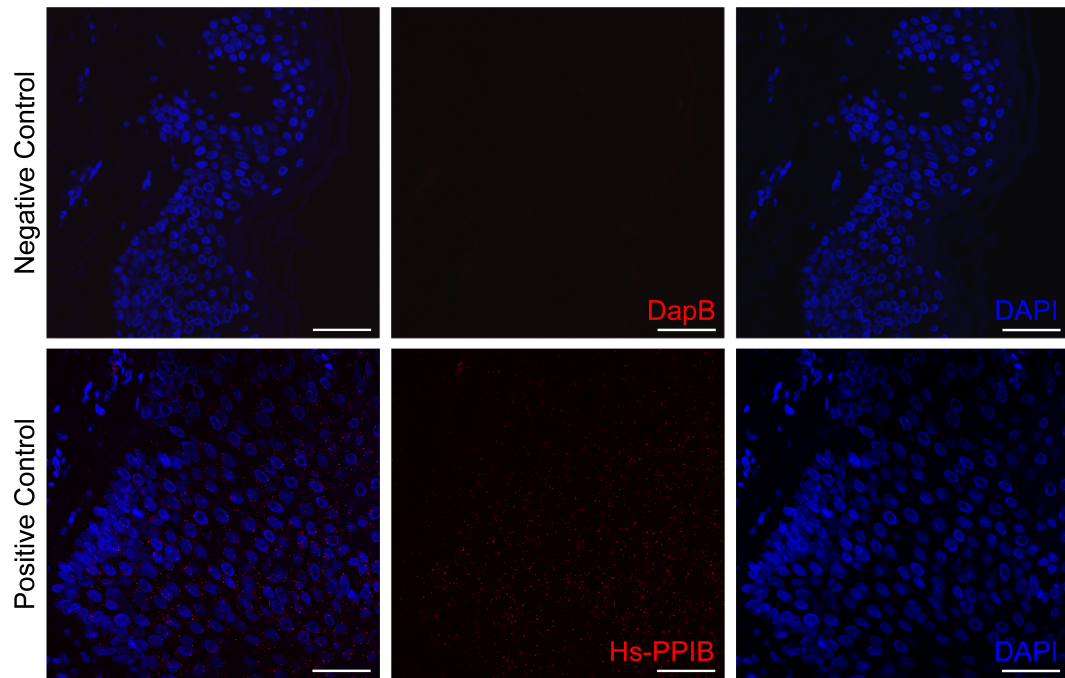

**Supplementary Figure 2 RNAscope negative and positive controls**

Representative RNAscope to probe DapB (negative control) and Hs-PPIB (positive control) in FFPE tissue sections of normal human skin (x400; bar=50 $\mu$ m).

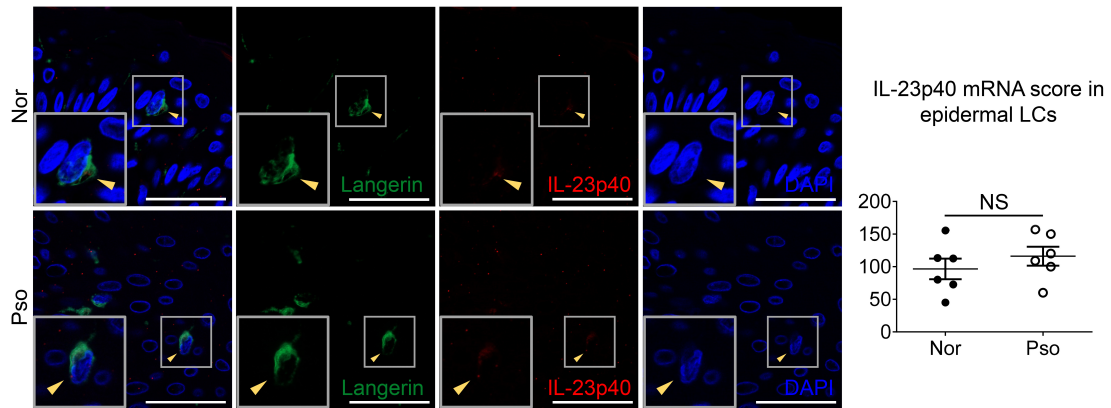

**Supplementary Figure 3 The IL-23p40 mRNA level of epidermal LCs from psoriasis patients is equivalent to normal LCs of healthy individuals**

RNA scope of IL-23p40 together with immunofluorescence of LCs and IL-23p40 mRNA score in epidermal LCs (x630; bar=40µm; n=12, three independent experiments). Two-tailed Student's t-test was performed. The data are presented as mean ± SEM.

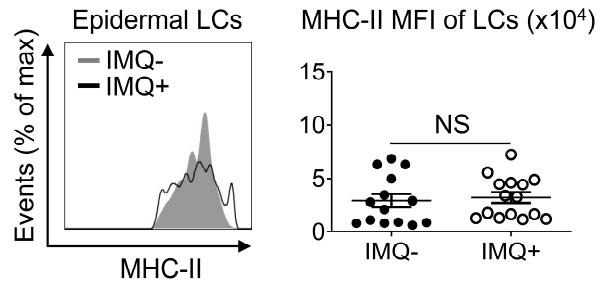

**Supplementary Figure 4 Imiquimod-induced psoriasis-like dermatitis did not influence LC expression of MHC-II**

Mice were treated as in **Figure 2A**, and epidermal LCs were harvested and stained as in **Figure 2, C-F**. Representative histogram and MFI of MHC-II in epidermal LCs (dark grey filled: IMQ-untreated; black line: IMQ-treated; n=29, seven independent experiments). Two-tailed Student's t-test was performed. The data are presented as mean  $\pm$  SEM.

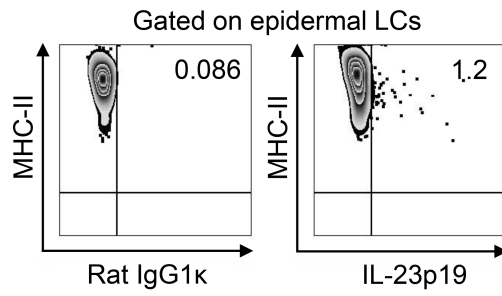

**Supplementary Figure 5 Langerhans cells secrete interleukin-23**

Epidermal cells freshly-isolated from IMQ- mice trunk skin was cultured in vitro in the presence of Golgi Stop for 4 hours, which were stained with anti-MHC-II, Langerin and IL-23p19 Ab or its isotype control Rat IgG1κ and analyzed by flow cytometry. Representative FACS analysis of Rat IgG1κ<sup>+</sup> (left panel) and IL-23p19<sup>+</sup> (right panel) LCs.

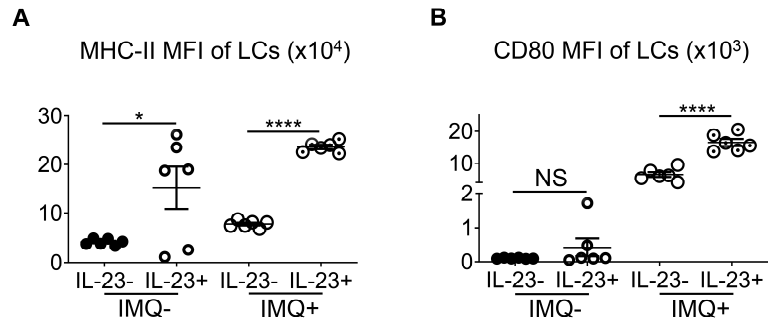

**Supplementary Figure 6 Interleukin-23-secreting Langerhans cells are more mature than interleukin-23-non-secreting Langerhans cells**

Epidermal cells freshly-isolated from mouse trunk skin of IMQ- and IMQ+ mice were cultured in vitro in the presence of Golgi Stop for 4 hours, which were stained with anti-MHC-II, CD45.2, CD80 and IL-23p19 Ab, and analyzed by flow cytometry. MHC-II (**A**) and CD80 (**B**) MFI of epidermal LCs from IMQ- and IMQ+ mice ( $n=12$ , three independent experiments). Two-tailed Student's t-test was performed. Tests were considered significant with  $P<0.05$  after multiple testing adjustments by the FDR method. The data are presented as mean  $\pm$  SEM. \* $P<0.05$ , \*\*\*\* $P<0.0001$ .

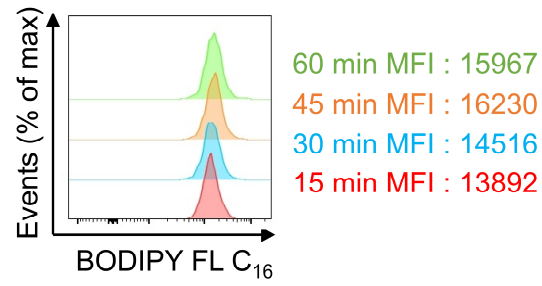

**Supplementary Figure 7 Langerhans cells achieve maximum uptake of BODIPY FL C<sub>16</sub> between 30 to 45 minutes**

Epidermal cells freshly-isolated from mouse trunk skin were incubated with BODIPY FL C<sub>16</sub> (1 $\mu$ M) at 37 °C for 15 minutes (red), 30 minutes (blue), 45 minutes (orange) and 60 minutes (green), which were stained with anti-MHC-II and anti-CD45.2 Ab and analyzed by flow cytometry.

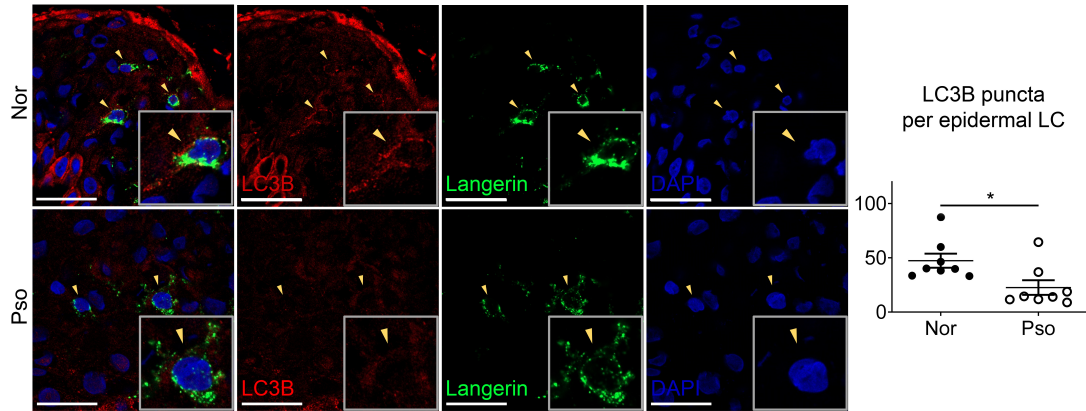

**Supplementary Figure 8 Decreased LC3B expression in epidermal LCs of psoriasis patients**

Representative immunofluorescence of LC3B expression and the quantities of LC3B puncta in LCs from frozen sections of normal human skins and psoriatic lesions (x630; bar=30 $\mu$ m; n=16, three independent experiments). Two-tailed Student's t-test was performed. The data are presented as mean  $\pm$  SEM. \* $P$ <0.05.



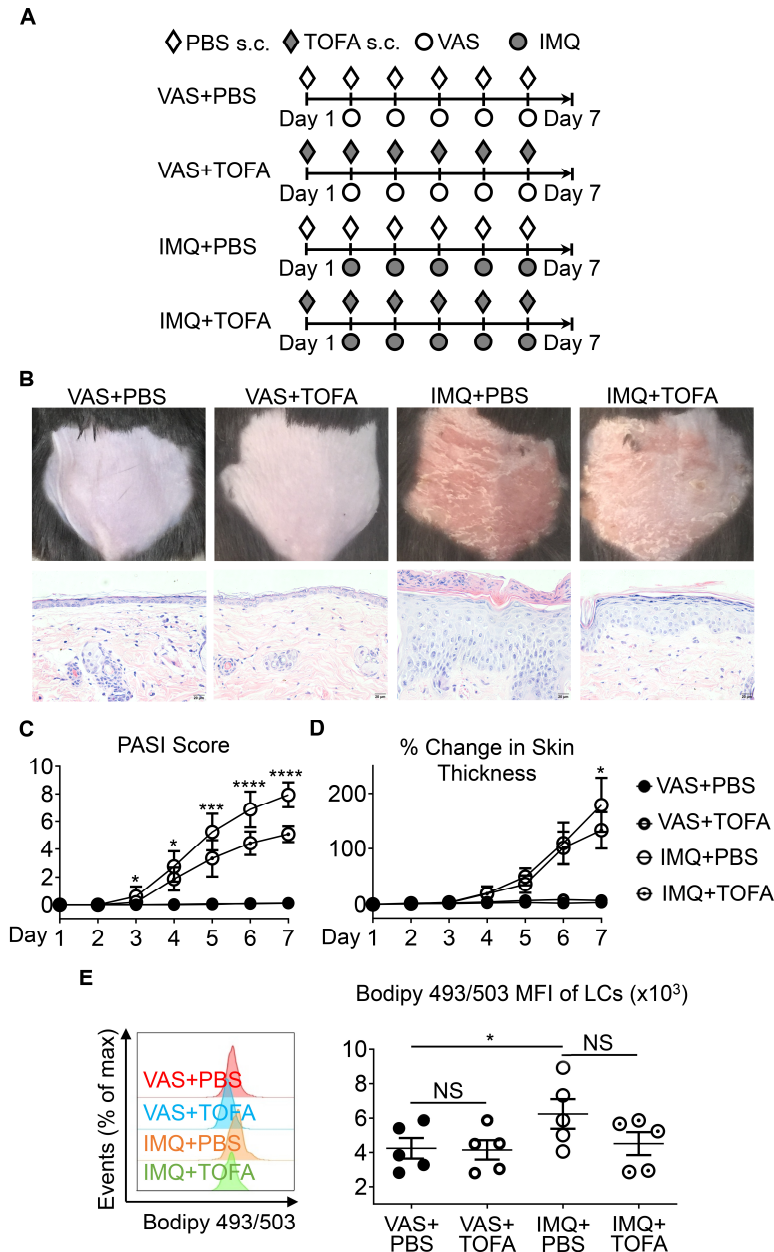

### Supplementary Figure 9 Subcutaneous administration of TOFA alleviated IMQ-induced psoriasis-like skin inflammation

Mice received a daily topical dose of 62.5 mg of 5% imiquimod (IMQ) cream or Vaseline (VAS) on shaved back for 5 consecutive days. 5-tetradecyloxy-2-furoic acid (TOFA; 5mg/kg body weight) or phosphate buffer saline (PBS) was administered subcutaneously one day before the application of VAS or IMQ cream, which continued for 6 successive days. **(A)** Schematic representation of experimental procedures. **(B)** Representative photographs of skin lesions (upper panel) and their H&E staining (lower panel; x400; bar=20 $\mu$ m). **(C)** Evaluation of skin inflammation severity using PASI score (n=68, five independent experiments). **(D)** The percentages of skin thickness increase measured by vernier calipers (n=68, five independent experiments). **(E)** Histogram and MFI of Bodipy 493/503 in epidermal LCs (n=20, three independent experiments). For Supplementary Figure 9C, D, one-way ANOVA was utilized to analyze the differences between four groups, and two-tailed Students t-test of the difference between IMQ+PBS group and IMQ+TOFA group was performed after multiple testing adjustments by the FDR

method, which statistical significances were annotated. For Supplementary Figure 9E, two-tailed Student's t-test was performed, and tests were considered significant with  $P < 0.05$  after multiple testing adjustments by the FDR method. The data are presented as mean  $\pm$  SEM. \* $P < 0.05$ , \*\*\* $P < 0.001$ , \*\*\*\* $P < 0.0001$ .

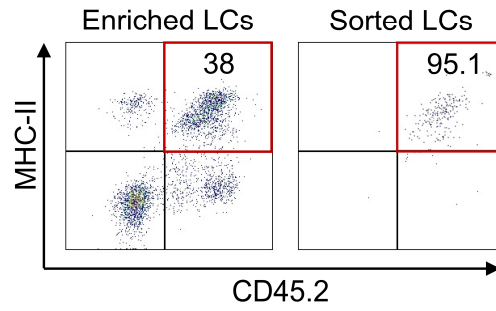

**Supplementary Figure 10 Langerhans cell purity after sorting**

Freshly-isolated epidermal cells underwent dead-cell removal and LC enrichment using microbeads, and stained with anti-MHC-II and anti-CD45.2 Ab. Epidermal LCs (MHC-II<sup>+</sup> CD45.2<sup>+</sup>) were sorted from LC-enriched epidermal cell suspensions by flow cytometry. Representative FACS analysis of LC-enriched epidermal cell suspensions and isolated LCs.

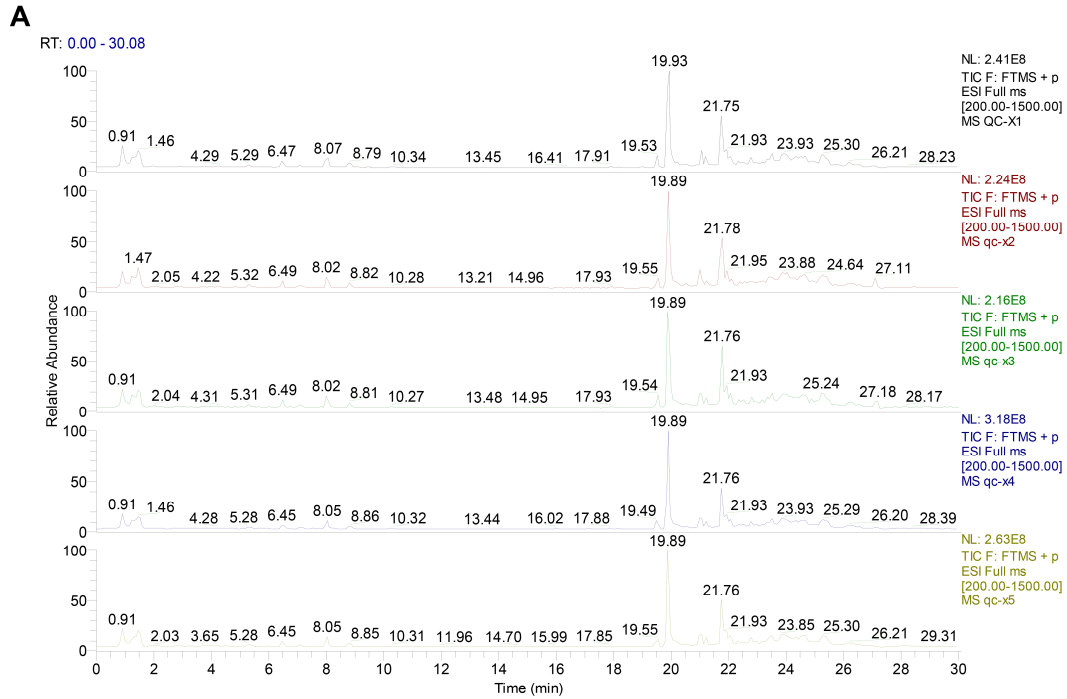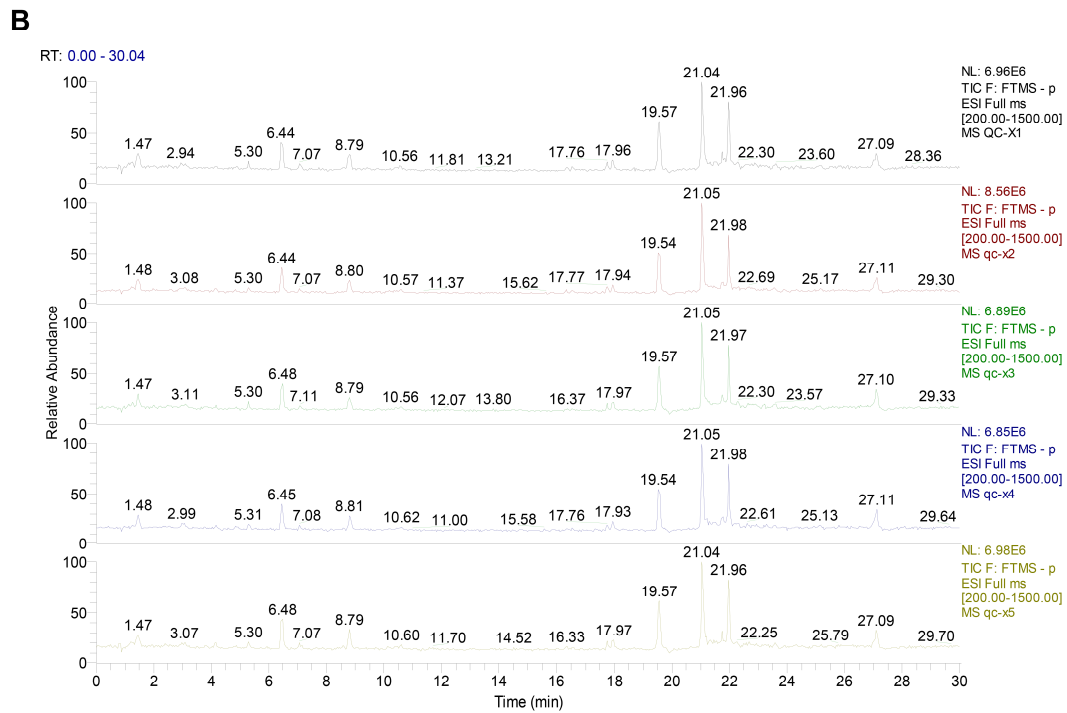

**Supplementary Figure 11 Total ion chromatograms of quality control samples**

The total ion chromatogram of quality control samples under the positive ion (ESI+) mode (A) and negative ion (ESI-) mode (B).

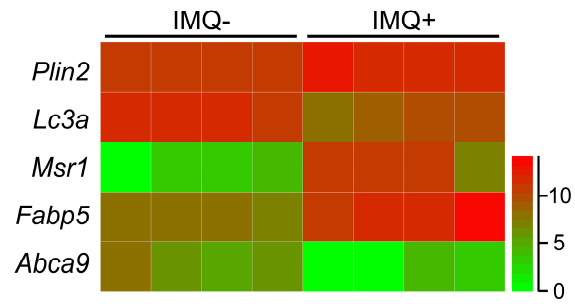

**Supplementary Figure 12 Heatmap of DEGs in epidermal Langerhans cells**

Epidermal LCs were freshly-sorted from IMQ- and IMQ+ mice and underwent low-input mRNA sequencing analysis as in **Figure 6**. Heatmap of *Plin2*, *Lc3a*, *Msr1*, *Fabp5*, and *Abca9* gene expressions in LCs.

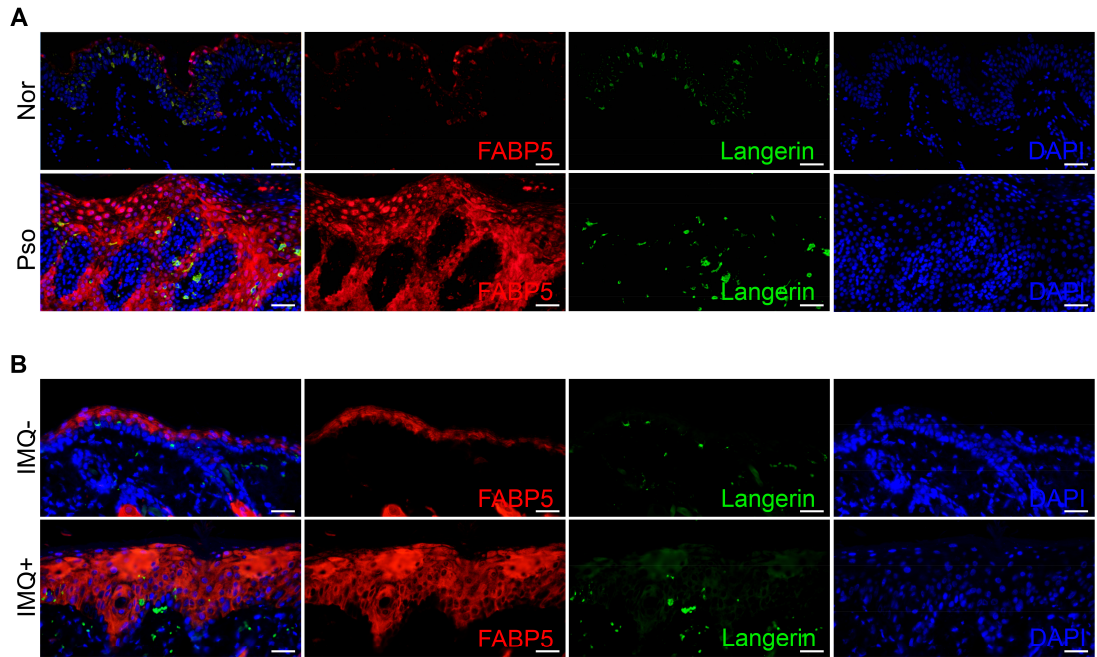

**Supplementary Figure 13 Epidermal LCs of psoriatic lesions and imiquimod-induced psoriasis-like skin have a higher level of FABP5 expression**

**(A)** Representative immunofluorescence of FABP5 expression in LCs from FFPE tissue sections of normal human skin and psoriatic lesions (x400; bar=50µm; n=10, two independent experiments).

**(B)** Representative immunofluorescence of FABP5 expression in LCs from back skin tissue of IMQ- and IMQ+ mice (x400; bar=50µm; n=12, two independent experiments).

**Supplementary Table 1 The summary of raw RNA sequencing data**

It showed the summary of RNA sequencing data of 8 samples, including raw reads, clean reads, and percentage of clean reads as well as Q20% and Q30% (the percentage of bases with Phred values > 20 and > 30)

| <b>Sample</b> | <b>Raw Reads</b> | <b>Clean Reads</b> | <b>Clean Reads%</b> | <b>Q20%</b> | <b>Q30%</b> |
|---------------|------------------|--------------------|---------------------|-------------|-------------|
| LC WT1        | 62294592         | 56980606           | 91.47%              | 95.01%      | 90.67%      |
| LC WT2        | 74742522         | 72550786           | 97.07%              | 96.30%      | 92.61%      |
| LC WT3        | 80486898         | 78262056           | 97.24%              | 94.56%      | 88.86%      |
| LC WT4        | 88174704         | 85223750           | 96.65%              | 95.06%      | 89.66%      |
| LC IMQ1       | 77731196         | 74677134           | 96.07%              | 94.65%      | 88.50%      |
| LC IMQ2       | 69286224         | 65610554           | 94.69%              | 94.50%      | 88.45%      |
| LC IMQ3       | 56106510         | 50923288           | 90.76%              | 93.15%      | 86.76%      |
| LC IMQ4       | 55336008         | 53485118           | 96.66%              | 95.75%      | 90.95%      |

**Supplementary Table 2 Gene ontology annotation enriched in the epidermal Langerhans cells from imiquimod-induced psoriasis-like skin in comparison with the Langerhans cells from normal skin by gene set enrichment analysis**

| Name                                                   | ES   | NES  | Nom p-val | FDR q-val |
|--------------------------------------------------------|------|------|-----------|-----------|
| GO_STRUCTURAL_CONSTITUENT_OF_RIBOSOME                  | 0.50 | 2.50 | <0.001    | 0.000     |
| GO_CCR_CHEMOKINE_RECEPTOR_BINDING                      | 0.63 | 2.31 | <0.001    | 0.005     |
| GO_G_PROTEIN_COUPLED_CHEMOATTRACTANT_RECEPTOR_ACTIVITY | 0.66 | 2.28 | <0.001    | 0.004     |
| GO_NUCLEOTIDE_RECEPTOR_ACTIVITY                        | 0.65 | 2.18 | <0.001    | 0.007     |
| GO_CHEMOATTRACTANT_ACTIVITY                            | 0.56 | 2.12 | <0.001    | 0.012     |
| GO_NADH_DEHYDROGENASE_ACTIVITY                         | 0.51 | 2.09 | <0.001    | 0.015     |
| GO_CHEMOKINE_RECEPTOR_BINDING                          | 0.52 | 2.04 | <0.001    | 0.021     |
| GO_LOW_DENSITY_LIPOPTEIN_PARTICLE_BINDING              | 0.62 | 1.97 | <0.001    | 0.031     |
| GO_CYTOKINE_ACTIVITY                                   | 0.37 | 1.96 | <0.001    | 0.029     |
| GO_CHEMOKINE_BINDING                                   | 0.54 | 1.93 | <0.001    | 0.034     |
| GO_C_C_CHEMOKINE_BINDING                               | 0.54 | 1.91 | 0.006     | 0.036     |
| GO_PROTEIN_LIPID_COMPLEX_BINDING                       | 0.52 | 1.86 | 0.006     | 0.047     |
| GO_PEPTIDE_RECEPTOR_ACTIVITY                           | 0.39 | 1.84 | <0.001    | 0.047     |
| GO_CHEMOKINE_ACTIVITY                                  | 0.48 | 1.83 | 0.006     | 0.045     |
| GO_CYTOKINE_RECEPTOR_ACTIVITY                          | 0.38 | 1.83 | <0.001    | 0.044     |
| GO_OLFACTORY_RECEPTOR_ACTIVITY                         | 0.39 | 1.79 | <0.001    | 0.052     |
| GO_PROTEASE_BINDING                                    | 0.37 | 1.78 | <0.001    | 0.054     |
| GO_PATTERN_RECOGNITION_RECEPTOR_ACTIVITY               | 0.51 | 1.75 | 0.006     | 0.060     |
| GO_LIPOPOLYSACCHARIDE_BINDING                          | 0.50 | 1.72 | 0.006     | 0.068     |
| GO_CYTOKINE_RECEPTOR_BINDING                           | 0.33 | 1.71 | <0.001    | 0.067     |
